# Supplementary material
Source: publisher figshare collection journal article supplement (https://gsapubs.figshare.com/ndownloader/files/26117033)
Supplement: Supplementary file 1 [file 26117033]

## Sheet: Sheet1
TABLE S2. THIN SECTION DESCRIPTIONS
Sample name	DZ sample name	Location	Grain size	Sorting	Matrix/Cement	Rounding	Minerals	Lithic clasts	Bioclasts	Lithology	Point Count?
Member 4
M20	MDZ9	30°45'21.90"N, 112°34'50.20"W	Fine sandstone	Moderate	Calcite cement and chert matrix	Angular	Qm, Qp, Fe oxides	Volcanics(?), Chert	Pelloids(?), molluscs, sponge spicules, ostracods, foraminifers	Fine-grained calcareous sandstone	Yes
M19		30°45'22.07"N, 112°34'20.84"W	Mud-lean packstone	Well	Micrite		Qm, rare Qp	Abundant chert, rare sed, rare mafic volcanics, limestone detrital clast with brachiopod	Echinoderms, rare bryozoans	Grainstone with abundant chert lithics	Yes
M18		30°45'22.04"N, 112°34'49.90"W	Grainstone	Moderate	Grain supported		Rare Qm/Qp	Rare chert, rare siltstone	Echinoderms, sponge spicules, molluscs, bryozoans, ostracods, gastropods, plant material(?)	Echinoderm grainstone	No
M17		30°45'37.15"N, 112°34'07.36"W	Wackestone	Poor	Micrite		Qm	Siltstone	Sponge spicules, molluscs, ostracods, echinoderms, bryozoans	Bryozoan grainstone	No
M16		30°45'38.21"N, 112°34'08.18"W	Grainstone	Moderate	Grain supported		Rare Qp	Rare siltstone	Echinoderms, sponge, bryozoans, gastropods	Echinoderm grainstone	No
M15		30°45'38.48"N, 112°34'04.74"W	Pack/	Poor	Micrite		Qp, Qm	Rare chert	Echinoderms, sponge spicules, molluscs, bryozoans, ostracods, gastropods	Echinoderm packstone	No
			Grainstone							grainstone
Member 3
M14		30°45'56.21"N, 112.34°22.26"W	Packstone	Poor	Micrite		Secondary Qp	Rare chert	Echinoderms, sponge spicules, molluscs	Echinoderm packstone	No
M13		30°45'48.37"N, 112°35'30.39"W	Mudstone		Micrite		Qm, rare Qp, Fe oxides	Rare chert	Sponge spicules, rare echinoderms	Spiculitic mudstone	No
Member 2
M12		30°46'00.30"N, 112°34'18.37"W	Medium sand	Poor	Feldspathic-cherty groundmass	Subangular	Plag, rare Qm and Qp	Volcanics(?), rare siltstone	None(?)	Feldspathic arenite	Yes
M11	MDZ5	30°45'44.06"N, 112°34'40.23"W	Mudstone	Well sorted	Micrite		Qm	None	Sponge spicules, ostracods, molluscs	Spiculitic mudstone	No
M10	MDZ3	30°45'02.14"N, 112°34'13.88W	Coarse sand	Poor	Feldspathic-cherty groundmass	Angular	Plag, Kspar(?)	Volcanics	Echinoderms, byrozoans	Feldspathic/Calcareous arenite	Yes
M9		30.75742N, 112.58801W	Mudstone/Wackestone	Moderate	Micrite		Qm	None	Sponge spicules, echinoderms, molluscs	Spiculitic mudstone/	No
										wackestone
M8		30°45'44.36"N, 112°34'15.61"W	Mudstone	Moderate	Micrite		Qm	None	Sponge spicules, radiolarian, gastropods, ostracods/	Spiculitic mudstone	No
									pelecypod(?)
M7		30°45'04.36"N, 112.34'04.14"W	Coarse	Very poor	Feldspathic-cherty groundmass	Angular	Plag, Kspar, Qp, Qm	Volcanics	Rare sponge spicules and echinoderms	Feldspathic arenite	Yes
M6		30°46'06.04"N, 112°34'04.37"W	Medium	Moderate	Feldspathic-cherty groundmass	Angular	Plag, Fe oxides	Volcanics	Echinoderms, sponge spicules, molluscs, gastropods	Feldspathic arenite	Yes
Member 1
M5		30°46'06.54"N, 112°34'57.96"W	Coarse upper to very coarse	Moderate	Feldspathic-cherty groundmass	Angular	Plag, rare Qp	Volcanics?	None	Feldspathic arenite	Yes
M4		30°46'04.10"N, 112°34'50.15"W	Medium upper to coarse	Moderate	Calcite cement	Angular	Plag, Kspar, Biotite, amphibole,	Volcanic	Echinoid	Feldspathic/Volcaniclastic sandstone	Yes
M3	MDZ2	30°46'03.84"N, 112°34'51.30"W	Very corase sand	Poor	Feldspathic-cherty groundmass	Angular	Plag, Kspar	Volcanic	Broken echinoid	Feldspathic arenite	Yes
M2		30°46'03.80"N, 112°34'38.86"W	Coarse sand	Poor to moderate	Calcite cement	Angular to subangular	Plag, rare Qm, rare Qp	Volcanic, sed	Sponge spicules, radiolaran, plant material	Feldspathic sandstone	Yes
M1	MDZ1	30°46'04.17"N, 112°34'38.85"W	Medium sand	Moderate	Calcite cement	Subangular	Plag, Biotite	Vitric and lathwork glass, all altered	None	Volcaniclastic sandstone	Yes
